# Supplementary material for: Photoelectrochemical properties of chemically exfoliated MoS2
Source: Royal Society of Chemistry journal article supplement (doi:10.1039/c3ta11633f), 2013-01-01
Supplement: c3ta11633f.pdf [file c3ta11633f.pdf]

## Supporting Information

### Photocurrent measurements

All photocurrent measurements were conducted with sodium sulphite, a sacrificial hole scavenger commonly used in photoelectrochemistry. The reaction mechanism for the oxidation of sulphite is detailed below:

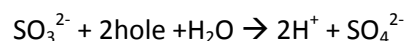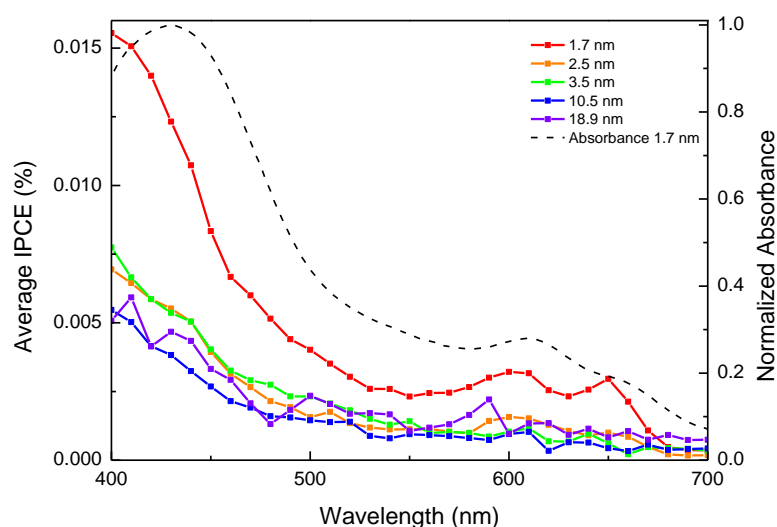

**Figure S1.** IPCE spectra for the different thicknesses for the MoS<sub>2</sub> only films.

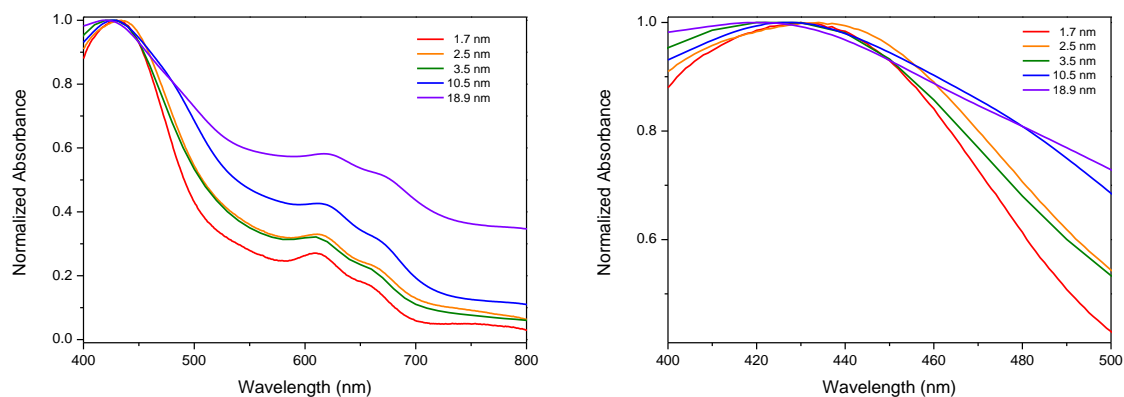

**Figure S2.** Normalized absorbance spectra (a) entire spectra, (b) 400 – 500 nm only, highlighting the red shift in absorbance peak for the thinnest films.

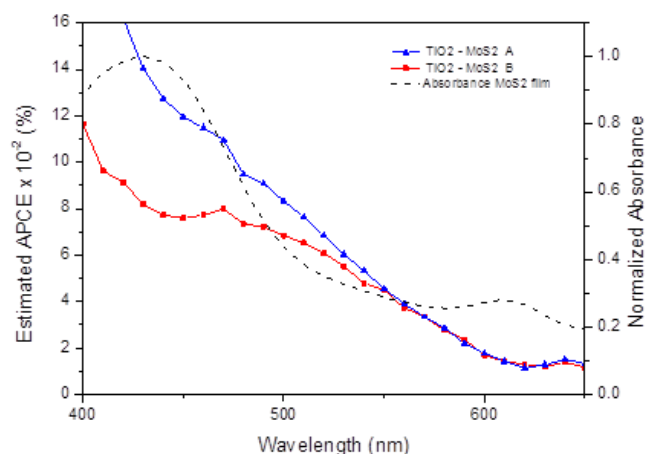

**Figure S3.** Estimated APCE for the composite films A and B (estimated by calculation of the known concentrations of MoS<sub>2</sub> dispersed into each film).

Photocurrent measurements of the MoS<sub>2</sub>-TiO<sub>2</sub> hybrid photoanodes was also measured utilizing iodine/triiodide electrolyte. The results are presented in Figure S4. Analogous to Figure 4 a photocurrent corresponding to excitons A/B is suppressed relative to the absorbance spectrum for the thin films. We therefore verify the assertion that conduction band is approximately -0.13 V  $\pm$  0.05V (against SHE reference).

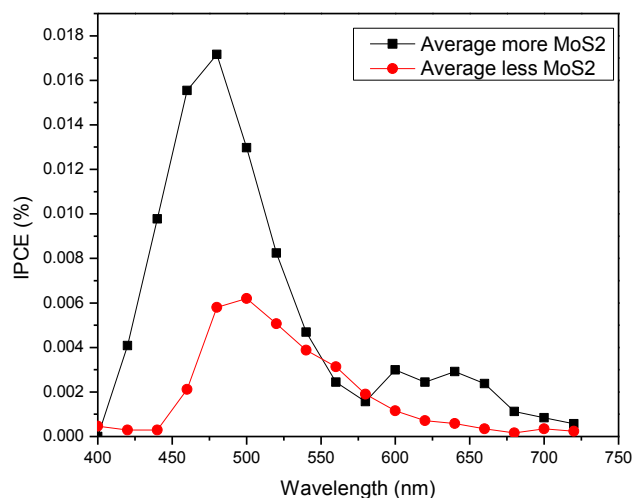

**Figure S4.** Average photocurrent for two ratios of MoS<sub>2</sub>/TiO<sub>2</sub> samples. Averages are calculated for 2 samples for each ratio and 3 measurements for each sample. Photocurrent was measured with Iodide/tri-iodide electrolyte.

To monitor the photoanodes for stability repeat runs of the same electrodes was completed. Figure S5 shows an example of three consecutive runs of a MoS<sub>2</sub> only photoanode.

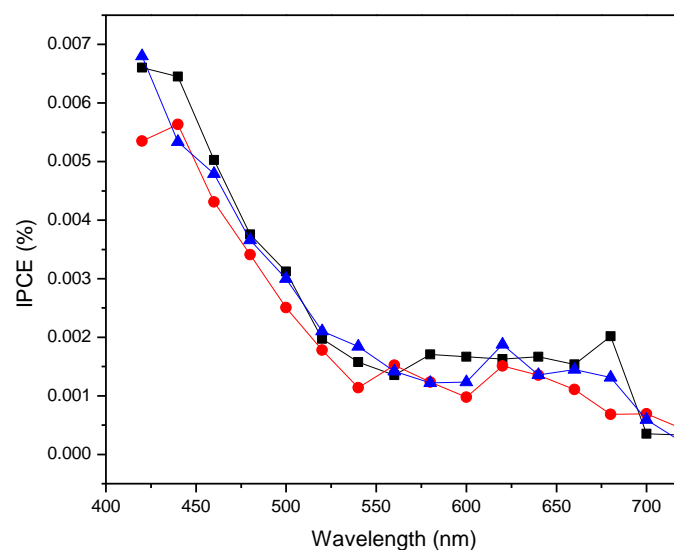

**Figure S5.** Three consecutive photocurrent measurements of the same photoanode.

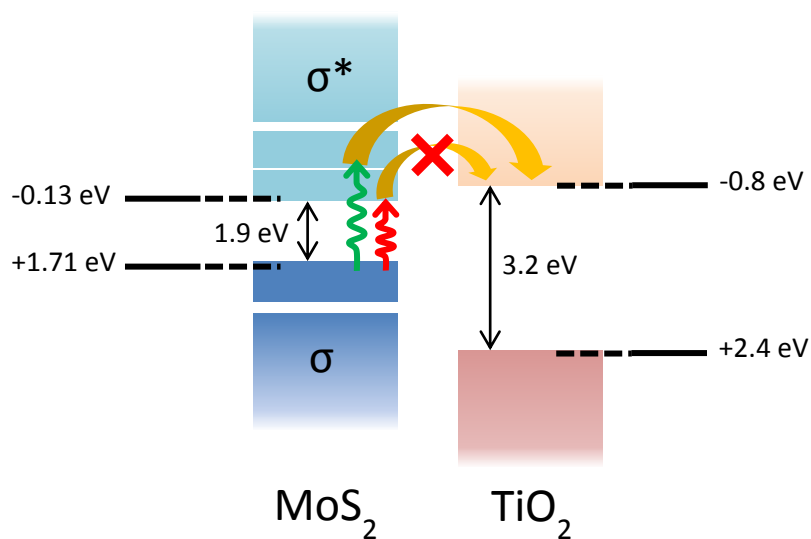

**Figure S6.** Approximate band structure of MoS<sub>2</sub> and TiO<sub>2</sub>. Details of the conduction band maxima and valence band minima are given (against NHE).
